# Supplementary material
Source: publisher site journal article supplement (https://www.dovepress.com/get_supplementary_file.php?f=480592.docx)
Supplement: Supplementary file 1 [file get_supplementary_file.php]

**Supplementary Data**

Bio-inspired Synthesis of Gold Nanoparticles Using Leaf Extract of *Jamun* and Research on Its Biomedical Potential

**Supplementary Table 1: Major active compounds identified from the aqueous leaf extracts of *S. cumini* by LC-MS analysis.**

| **S. No** | **Rt [min]** | **MolWt** | **ESI mode** | **Monoisotropic mass** | **Chemical formula** | **Compounds** | **References** |
| --- | --- | --- | --- | --- | --- | --- | --- |
| 1 | 6.14 | 386 | [M+H]+ | 386.100168 | C20H18O8 | diferulic acid | 1 |
| 2 | 8.58 | 184 | [M+H]+ | 184.037173 | C8H8O5 | methylgallate | 1 |
| 3 | 2.18 | 290 | [M+H]+ | 290.079038 | C10H12O4 | cianidanol | 2 |
| 4 | 9.42 | 273 | [M+H]+ | 272.068473 | C15H12O5 | butin | 1 |
| 5 | 15.82 | 300 | [M+H]+ | 300.063388 | C16H12O6 | kaempferide | 1 |
| 6 | 3.27 | 226 | [M+H]+ | 226.09938 | C15H14O2 | 4′-hydroxyflavan | 3 |
| 7 | 20.07 | 304 | [M+H]+ | 304.058303 | C15H12O7 | taxifolin | 4 |
| 8 | 10.63 | 257 | [M+H]+ | 256.24023 | C16H32O2 | palmitic acid | 5 |
| 9 | 22.28 | 278 | [M+H]+ | 278.224580204 | C18H30O2 | punicic acid | 6 |
| 10 | 14.50 | 222 | [M+H]+ | 222.198365 | C15H26O | cedrol | 7 |
| 11 | 1.67 | 180 | [M+H]- | 180.042259 | C9H8O4 | caffeic acid | 1 |
| 12 | 1.74 | 166 | [M+H]- | 166.062994 | C9H10O3 | 3(3-hydroxyphenyl)propanoic acid | 4 |
| 13 | 1.92 | 196 | [M+H]- | 196.073559 | C10H12O4 | xanthoxylin | 6 |
| 14 | 2.50 | 194 | [M+H]- | 194.057909 | C10H10O4 | ferulic acid | 2 |
| 15 | 2.82 | 192 | [M+H]- | 192.063388 | C7H12O6 | quinic acid | 4 |
| 16 | 7.93 | 448 | [M+H]- | 448.100561 | C21H20O11 | astragalin | 3 |
| 17 | 3.52 | 356 | [M+H]- | 356.1107 | C16H20O9 | 6-O-feruloyl-D-glucose | 1 |
| 18 | 3.18 | 170 | [M+H]+/[M+H]- | 170.021523 | C7H6O5 | gallic acid | 8 |
| 19 | 7.21 | 464 | [M+H]+/[M+H]- | 464.095476 | C21H20O12 | isoquercetin | 9 |
| 20 | 7.33 | 372 | [M+H]+/[M+H]- | 372.120903 | C20H20O7 | 3,5,7,4′-tetrahydroxy-6-(3-hydroxy-3-methylbutyl)flavone | 6 |

Reproduced under the terms of the Creative Commons Attribution-Non Commercial-No Derivs (CC BY-NC-ND), allowing third parties to download and share its works but not commercially purposes or to create derivative works from Shidiki and Vyas, 10.

**Supplementary Table 2: Identification of bioactive compounds in leaf extract of *S. cumini* by a number of analytical techniques**

| **Extraction method** | **Compounds detected** | **References** |
| --- | --- | --- |
| HPLC | Phenolic compounds | 11 |
| LC–MS and NMR | 3-O- (4”-Oacetyl)-alpha-L-rhamnopyranosides of mearnsetin (myricetin 4’-methyl ether) and myricetin 3-O- (4”-Oacetyl-2”-O-galloyl)–alpha-L-rhamnopyranoside | 12 |
| Analytical method | quercetin, myricetin, myricitrin, myricetin 3-O-(4”-acetyl)-α-­L-rhamnopyranosides | 8 |
| GC-MS analysis | Fumaric acid, 4-heptyl tridecyl ester; Benzo[h]quinoline, 2,4-dimethyl-; 1,2-Benzisothiazol-3-amine tbdms; Benzo[h]quinoline, 2,4-dimethyl-; 1,4-Bis(trimethylsilyl)benzene | 13 |
| LC-MS analysis | caffeic acid, 3-(3-hydroxy phenyl) propionic acid, xanthoxylin, ferulic acid, quinic acid, diferulic acid, methyl gallate, and gallic acid; astragalin, cianidanol, butin, kaempferide, 4′-hydroxyflavan, taxifolin, isoquercetin, and 3,5,7,4′-tetrahydroxy-6-(3-hydroxy-3-methylbutyl) flavone; cedrol; 6-O-feruloyl-D-glucose; palmitic acid and punicic acid | 10 |
| Analytical method | betulinic acid, crategolic acid, n-dotricontanol, n-hentriacontane, n-hepatcosane, mycaminose, myricetin, myricitrin, myricetin 3-O-(4″-acetyl)-  α-L-rhamnopyranosides, n-nonacosane, quercetin, β-sitosterol,  noctacosanol, n-triacontanol, triterpenoids, tannins, eicosane,  octacosane and octadecane. | 9 |
| HPLC-MS/MS | hexahydroxydiphenoyl-glucose (HHDP-glucose); pedunculagin I; di-HHDP-galloyl-glucose (casuarinin); (epi) gallocatechin-(epi)gallocatechin-O-gallate; myricetin-derived compounds; myricetin deoxyhexoside; isomers of acylated myricetin deoxyhexoside; acylated methylmyricetin deoxyhexoside | 14 |

**Supplementary Table 3: Biological properties of all the identified compounds from JLE.**

| **No.** | **Compound name** | **Biological properties** | **References** |
| --- | --- | --- | --- |
|  | 2-Penten-1-ol, (Z)- | Used as a fragrance ingredient including all human health endpoints.  Used in cosmetics, fine fragrances, shampoos, toilet soaps and other toiletries as well as in non-cosmetic products such as household cleaners and detergents. | 15 |
|  | Furan, 2-ethyl- | It has a role as a plant metabolite, a fragrance | 16 |
|  | Hexanal | Antimicrobial, ethylene release-slowing, and phospholipase D (PLD)-inhibiting properties | 17-19 |
|  | (1R)-2,6,6-Trimethylbicyclo[3.1.1]hept-2-ene; Cyclohexene, 1-methyl-4-(1-methylethenyl)-, (R)- ; . α.-Pinene; Tricyclo[2.2.1.02,6]heptane, 1,7,7-trimethyl- ; 2-Pinene ; BICYCLO[3.1.1]HEPT-2-ENE, 2,6,6-TRIMETHYL- ; | Antioxidant activities | 20 |
|  | 2(10)-Pinene; Bicyclo[3.1.1]heptane, 6,6-dimethyl-2-methylene-, (1S)- | antibiotic resistance modulation, anticoagulant, antitumor, antimicrobial, antimalarial, antioxidant, anti-inflammatory, anti-Leishmania, and analgesic effects, cytogenetic, gastroprotective, anxiolytic, cytoprotective, anticonvulsant, insecticidal and neuroprotective effects | 21-24 |
|  | alfa-Copaene; Copaene | cytotoxic, genotoxic/antigenotoxic and antioxidant/oxidant activity | 25 |
|  | (+)-epi-Bicyclosesquiphellandrene; cis-Muurola-4(15),5-diene | Component of essential oils with medicinal properties | 26,27 |
|  | (+)-epi-Bicyclosesquiphellandrene | Component of essential oils with medicinal properties | 26,27 |
|  | Naphthalene, 1,2,3,4,4a,7-hexahydro-1,6-dimethyl-4-(1-methylethyl)- ; CADINA-1,4-DIENE | Toxicity effect against insect pest. Component of essential oil of plants | 28 |
|  | .alpha.-Muurolene | Component of essential oil. Anti-inflammatory, antioxidant, and antimicrobial | 29-33 |
|  | Naphthalene, 1,2,3,4,4a,5,6,8a-octahydro-7-methyl-4-methylene-1-(1-methylethyl)-, (1.alpha.,4a.beta.,8a.alpha.)- ; Naphthalene, 1,2,4a,5,6,8a-hexahydro-4,7-dimethyl-1-(1-methylethyl)- | Toxicity effect against insect pest. Component of essential oil of plants | 28 |
|  | .delta.-Cadinene | Anticancer, anti-microbial, anti-fungal, antioxidant and anti-inflammatory | 34-37 |
|  | Cubenene | Component of essential oil of plants. | 38,39 |
|  | Naphthalene, 1,2,4a,5,6,8a-hexahydro-4,7-dimethyl-1-(1-methylethyl)-, [1S-(1.alpha.,4a.beta.,8a.alpha.)]- ; .alpha.-cadinene | Antioxidant, larvicidal activity, component of essential oil. | 40-43 |
|  | 1,H-Dimethyl-7(1-hydroxy-1-methylethyl)[3,3a,4,5,6,7]hexahydro azulene; alpha-Guajene | Component of essential oil with anti-inflammatory, antinociceptive, antipyretic, and antioxidant effects. | 44,45 |
|  | 1-ISOPROPYL-7-METHYL-4-METHYLENE-1,2,3,4,4A,5,6,8A-OCTAHYDRONAPHTHALENE; .gamma.-Muurolene; | Component of essential oil with antimicrobial, antioxidant and anti-inflammatory activities | 46-48 |
|  | 6.alpha.-Cadina-4,9-diene, (-)-;.gamma.-Muurolene | Component of essential oil with antimicrobial, antioxidant, antinociceptive and anti-inflammatory activities | 48-50 |
|  | 1,1,7-TRIMETHYL-4-METHYLENEDECAHYDRO-1H-CYCLOPROPA[E]AZULENE | anti-inflammatory with peptic ulcers, antineoplastic with leukemia, antidiabetes, antiretroviral with HIV-1, antimicrobial, including antimicrobial photodynamic therapy, and antifungal | 51-53 |

**References**

1. Ramya S, Neethirajan K, Jayakumararaj R. Profile of bioactive compounds in *Syzygium cumini*-a review. *J Pharm Res.* 2012;5(8):4548-4553.

2. Chhikara N, Kaur R, Jaglan S, Sharma P, Gat Y, Panghal A. Bioactive compounds and pharmacological and food applications of *Syzygium cumini*–a review. *Food Function.* 2018;9(12):6096-6115.

3. Bijauliya RK, Alok S, Singh M, Mishra SB. Morphology, phytochemistry and pharmacology of Syzygium cumini (Linn.)-an overview. *Int J Pharma Sci Res.* 2017;8(6):2360-2371.

4. Singh B, Singh JP, Kaur A, Singh N. Insights into the phenolic compounds present in jambolan (*Syzygium cumini*) along with their health-promoting effects. *Int J Food Sci Technol.* 2018;53(11):2431-2447.

5. Ayyanar M, Subash-Babu P. *Syzygium cumini* (L.) Skeels: A review of its phytochemical constituents and traditional uses. *Asian Pac J Trop Biomed.* 2012;2(3):240-246.

6. Chagas VT, França LM, Malik S, Paes AMdA. *Syzygium cumini* (L.) skeels: a prominent source of bioactive molecules against cardiometabolic diseases. *Front Pharmacol.* 2015;6:259.

7. Satpute S, Vanmare D, Samarthnagar A. Phytochemical Screening of leaf extract of *Syzygium cumini* L. by HRLC-MS spectra method. *Int JS Res Sci.* 2018;4:33-37.

8. Timbola A, Szpoganicz B, Branco A, Monache F, Pizzolatti M. A new flavonol from leaves of *Eugenia jambolana*. *Fitoterapia.* 2002;73(2):174-176.

9. Jagetia GC. Phytochemical Composition and pleotropic pharmacological properties of jamun, *Syzygium cumini* skeels. *J Explor Res Pharmacol.* 2017;2(2):54-66.

10. Shidiki A, Vyas A. Molecular docking and pharmacokinetic prediction of phytochemicals from *Syzygium cumini* in interaction with penicillin-binding protein 2a and erythromycin ribosomal methylase of Staphylococcus aureus. *Biotechnologia.* 2022;103(1):5-18.

11. Balyan U, Verma SP, Sarkar B. Phenolic compounds from *Syzygium cumini* (L.) Skeels leaves: Extraction and membrane purification. *J Appl Res Med Aroma Plant.* 2019;12:43-58.

12. Mahmoud II, Marzouk MS, Moharram FA, El-Gindi MR, Hassan AM. Acylated flavonol glycosides from *Eugenia jambolana* leaves. *Phytochem.* 2001;58(8):1239-1244.

13. Murali V, Devi VM. Antioxidant Analysis, FTIR and GC-MS Characterization of *Syzygium cumini* Leaf Extract. *Annal Roman Soc Cell Biol.* 2021:15880-15892.

14. Sanches JR, Franca LM, Chagas VT, et al. Polyphenol-rich extract of *Syzygium cumini* leaf dually improves peripheral insulin sensitivity and pancreatic islet function in monosodium L-glutamate-induced obese rats. *Front Pharmacol.* 2016;7:48.

15. McGinty D, Letizia CS, Api AM. Fragrance material review on (Z)-2-penten-1-ol. *Food and Chemical Toxicology.* 2010;48:S84-S86.

16. 2-Ethylfuran 2024; https://hmdb.ca/metabolites/HMDB0040587#biological_properties:https://hmdb.ca/metabolites/HMDB0040587#biological_properties. Accessed 2024.10.07, 2024.

17. Tiwari K, Paliyath G. Microarray analysis of ripening-regulated gene expression and its modulation by 1-MCP and hexanal. *Plant Physiol Biochem.* 2011;49(3):329-340.

18. Aghdam MS, Hassanpouraghdam MB, Paliyath G, Farmani B. The language of calcium in postharvest life of fruits, vegetables and flowers. *Scientia Horticul.* 2012;144:102-115.

19. Cui X, You Y, Ding Y, et al. Improving the function of electrospun film by natural substance for active packaging application of fruits and vegetables. *LWT Food Sci Technol.* 2024;191:115683.

20. Li Y, Cao X, Sun J, et al. Characterization of chemical compositions by a GC–MS/MS approach and evaluation of antioxidant activities of essential oils from *Cinnamomum reticulatum* Hay, *Leptospermum petersonii* Bailey, and *Juniperus formosana* Hayata. *Arab J Chem.* 2022;15(2):103609.

21. Salehi B, Upadhyay S, Erdogan Orhan I, et al. Therapeutic Potential of α- and β-Pinene: A Miracle Gift of Nature. *Biomolecules.* 2019;9(11):738.

22. Rivas da Silva AC, Lopes PM, Barros de Azevedo MM, Costa DC, Alviano CS, Alviano DS. Biological activities of α-pinene and β-pinene enantiomers. *Molecules.* 2012;17(6):6305-6316.

23. Allenspach M, Steuer C. α-Pinene: A never-ending story. *Phytochem.* 2021;190:112857.

24. Saldanha E, Pai RJ, George T, et al. Chapter 17 - Health Effects of Various Dietary Agents and Phytochemicals (Therapy of Acute Pancreatitis). In: Grumezescu AM, Holban AM, eds. *Therapeutic, Probiotic, and Unconventional Foods*: Academic Press; 2018:303-314.

25. Türkez H, Celik K, Toğar B. Effects of copaene, a tricyclic sesquiterpene, on human lymphocytes cells in vitro. *Cytotechnol.* 2014;66(4):597-603.

26. Guerrero A, Guerrero E, Cartuche L, Cumbicus N, Morocho V. Chemical Profiling of *Hedyosmum cumbalense* and *Hedyosmum spectabile* (Chloranthaceae) Essential Oils, and Their Antimicrobial, Antioxidant, and Anticholinesterase Properties. *Plants.* 2023;12(1):39.

27. Franco CR, Alves PB, Andrade DM, et al. Essential oil composition and variability in *Hyptis fruticosa*. *Revista Brasileira de Farmacognosia.* 2011;21:24-32.

28. Aisyah M, Puspasari L, Rusmin D. Toxicity and chemical compounds of *Piper aduncum* fruit extract against storage pest *Sitophilus oryzae* and *Callosobruchus maculatus*. Paper presented at: IOP Conference Series: Earth and Environmental Science2023.

29. Passos BG, de Albuquerque RDDG, Muñoz-Acevedo A, et al. Essential oils from Ocotea species: Chemical variety, biological activities and geographic availability. *Fitoterapia.* 2022;156:105065.

30. El Omari N, Ezzahrae Guaouguaou F, El Menyiy N, et al. Phytochemical and biological activities of *Pinus halepensis* mill., and their ethnomedicinal use. *J Ethnopharmacol.* 2021;268:113661.

31. Pereira I, Marques M, Pavan A, et al. Leishmanicidal activity of benzophenones and extracts from *Garcinia brasiliensis* Mart. fruits. *Phytomed.* 2010;17(5):339-345.

32. Espirito Santo B, Santana LF, Kato Junior WH, et al. Medicinal Potential of Garcinia Species and Their Compounds. *Molecules.* 2020;25(19).

33. Marinas IC, Oprea E, Buleandra M, et al. Chemical Composition, Antipathogenic and Cytotoxic Activity of the Essential Oil Extracted from *Amorpha fruticosa* Fruits. *Molecules.* 2021;26(11):3146.

34. Hui L-M, Zhao G-D, Zhao J-J. δ-Cadinene inhibits the growth of ovarian cancer cells via caspase-dependent apoptosis and cell cycle arrest. *Int J Clin Experiment Pathol.* 2015;8(6):6046.

35. Ringel M, Dimos N, Himpich S, et al. Biotechnological potential and initial characterization of two novel sesquiterpene synthases from *Basidiomycota Coniophora* *puteana* for heterologous production of δ-cadinol. *Microb Cell Factor.* 2022;21(1):64.

36. Gennadios HA, Gonzalez V, Di Costanzo L, et al. Crystal structure of (+)-δ-cadinene synthase from *Gossypium arboreum* and evolutionary divergence of metal binding motifs for catalysis. *Biochem.* 2009;48(26):6175-6183.

37. Kundu A, Saha S, Walia S, Ahluwalia V, Kaur C. Antioxidant potential of essential oil and cadinene sesquiterpenes of *Eupatorium adenophorum*. *Toxicol Environ Chem.* 2013;95(1):127-137.

38. Nabeta K, Kigure K, Fujita M, et al. Biosynthesis of (+)-cubenene and (+)-epicubenol by cell-free extracts of cultured cells of *Heteroscyphus planus* and cyclization of [2H] farnesyl diphosphates. *J Chem Soc Perkin Transact 1.* 1995(15):1935-1939.

39. Chen C, Yao G, Wang F, et al. Identification of a (+)-cubenene synthase from filamentous fungi *Acremonium chrysogenum*. *Biochem Biophy Res Commun.* 2023;677:119-125.

40. Rădulescu M, Jianu C, Lukinich-Gruia AT, et al. Chemical Composition, In Vitro and In Silico Antioxidant Potential of *Melissa officinalis* subsp. officinalis Essential Oil. *Antioxidants.* 2021;10(7):1081.

41. Chappell J, Coates RM. 1.16 - Sesquiterpenes. In: Liu H-W, Mander L, eds. *Comprehensive Natural Products II*. Oxford: Elsevier; 2010:609-641.

42. Xu W, Popovich DG. Chapter 3 - Bioactive hybrid compounds from Myrtaceae: Chemical classification and biological activities. In: Atta ur R, ed. *Studies in Natural Products Chemistry.* Vol 77: Elsevier; 2023:65-109.

43. Russo EB, Marcu J. Chapter Three - Cannabis Pharmacology: The Usual Suspects and a Few Promising Leads. In: Kendall D, Alexander SPH, eds. *Advances in Pharmacology.* Vol 80: Academic Press; 2017:67-134.

44. Aati H, El-Gamal A, Kayser O. Chemical composition and biological activity of the essential oil from the root of *Jatropha pelargoniifolia* Courb. native to Saudi Arabia. *Saudi Pharma J.* 2019;27(1):88-95.

45. Bahuguna A, Dubey SK, Arti. Phytochemical profiling, molecular docking, and ADMET evaluation of essential oils from *Anaphalis busua* and *Anaphalis margaritacea* in Uttarakhand's Himalayan Terrain. *Phytomed Plus.* 2024;4(4):100645.

46. Mohan L, Negi A, Melkani AB, Dev V. Chemical composition and antibacterial activity of essential oil from Salvia mukerjeei. *Nat Prod Commun.* 2011;6(12):1949-1952.

47. Darwish RS, Hammoda HM, Ghareeb DA, et al. Efficacy-directed discrimination of the essential oils of three Juniperus species based on their in-vitro antimicrobial and anti-inflammatory activities. *J Ethnopharmacol.* 2020;259:112971.

48. Zuccolotto T, Bressan J, Lourenço AV, et al. Chemical, antioxidant, and antimicrobial evaluation of essential oils and an anatomical study of the aerial parts from Baccharis species (Asteraceae). *Chem Biodiver.* 2019;16(4):e1800547.

49. Perigo CV, Torres RB, Bernacci LC, et al. The chemical composition and antibacterial activity of eleven Piper species from distinct rainforest areas in Southeastern Brazil. *Ind Crop Prod.* 2016;94:528-539.

50. Queiroz JCC, Antoniolli ÂR, Quintans-Júnior LJ, et al. Evaluation of the anti-inflammatory and antinociceptive effects of the essential oil from leaves of *Xylopia laevigata* in experimental models. *Sci World J.* 2014;2014.

51. Bakun P, Czarczynska-Goslinska B, Goslinski T, Lijewski S. In vitro and in vivo biological activities of azulene derivatives with potential applications in medicine. *Med Chem Res.* 2021;30:834-846.

52. Slon E, Slon B, Kowalczuk D. Azulene and Its Derivatives as Potential Compounds in the Therapy of Dermatological and Anticancer Diseases: New Perspectives against the Backdrop of Current Research. *Molecules.* 2024;29(9):2020.

53. Leino TO, Sieger P, Yli-Kauhaluoma J, Wallén EAA, Kley JT. The azulene scaffold from a medicinal chemist's perspective: Physicochemical and in vitro parameters relevant for drug discovery. *European J Med Chem.* 2022;237:114374.
